# Supplementary material for: Combined Fungicide Treatment Affects Soil Microbial Community and Incidences of Fungal Diseases on Wheat
Source: Preprints.org preprint supplement (doi:10.20944/preprints202209.0177.v1), 2022-09-13
Supplement: Supplementary file 1 [file supplementary]

#### Combined Fungicide Treatment Affects Soil Microbial Community and Incidences of Fungal Diseases on Wheat

Alexey S. Vasilchenko1*, Darya V. Poshvina1, Mikhail V. Semenov1,2, Vyacheslav Timofeev3, Artyom Stepanov1, Arina N. Pervushina1 and Anastasia V. Vasilchenko 1

1Laboratory of Antimicrobial Resistance, Institute of Environmental and Agricultural Biology (X-BIO), Tyumen State University, Tyumen, Russian Federation

2 Dokuchaev Soil Science Institute, Moscow, Russian Federation

3 Scientific Research Institute of Agriculture for Northern Trans-Ural Region **-** Branch of Tyumen Scientific Centre SB RAS

**Supplementary material**

Table S1. The genera of soil bacteria and fungi that were not detected in 16S rRNA and ITS sequence libraries

| **Bacteria which are absent in the fungicide treated soil** | **Bacteria which are absent in the intact soil** | **Fungi** **which are absent in the fungicide treated soil** | **Fungi which are absent in the intact soil** |
| --- | --- | --- | --- |
| *Tardiphaga* | *Glycomyces* | *Rhizopus elegans* | *Arthrographis* |
| *Chryseolinea* | *Actinosynnema* | *Gliomastix* | *Lecythophora* |
| *Salinisphaera_A* | *Hyphomicrobium* | *Idriella* |  |
| *Devosia* | *Promicromonospora* | *Agrocybe* |  |
| *Kaistia* | *Pseudoduganella* | *Conocybe* |  |
| *Luteitalea* | *Chryseobacterium* | *Schizothecium* |  |
| UBA1315 | QHVH01 |  |  |
| *Flavobacterium* | DP-6 |  |  |
| PMG-095 | 17J80-11 |  |  |
| *Herminiimonas* | Ga0077541 |  |  |
| Opi-474 | JACDCK01 |  |  |
| SHYK01 | Palsa-1392 |  |  |
